# Supplementary material for: The EIF4EBP3 translational repressor is a marker of CDC73 tumor suppressor haploinsufficiency in a parathyroid cancer syndrome
Source: PubMed Central journal article supplement — Cell Death Dis. 2012 Feb 2;3(2):266–. doi: 10.1038/cddis.2012.6 (PMC3288348; doi:10.1038/cddis.2012.6), 2012-02-02
Supplement: cddis20126x1.pdf [file cddis20126x1.pdf]

**Supplemental Data** for “The *EIF4EBP3* translational repressor is a marker of *CDC73* tumor suppressor haploinsufficiency in a parathyroid cancer syndrome” by Zhang et al, CDDIS-11-0126R

Supplementary Table 1. **Patient Characteristics in Control, *CDC73/HRPT2*, and *MEN1* Patient Groups.** P-values determined by Fisher’s exact test (gender comparisons to control) or unpaired Student’s t-test (age comparisons to control). All differences were non-significant.

Supplementary Figure 1. **Reduction of parafibromin expression in *Mtor* heterozygous mouse tissues.** Homogenates from the indicated wild-type and *Mtor* heterozygous mouse tissues were analyzed by quantitative immunoblotting using infrared imaging, as described in Materials and Methods. (A) Quantitation of parafibromin expression in mouse pancreas, liver, kidney and lung in two independent experiments, (B) Immunoblots of the indicated mouse tissues with anti-parafibromin (upper panel) and anti- $\beta$ -actin (lower panel) primary antibodies, with the relative mobility of the main immunoreactive bands indicated on the right.

Supplementary Figure 2. **Serum starvation increases *CDC73/HRPT2* transcript levels in human peripheral mononuclear leukocytes.** Levels of *CDC73/HRPT2* transcript were estimated by quantitative RT-PCR in normal human peripheral mononuclear cells after 72 hour culture either with serum or with serum starvation, as described in Materials and Methods. \*\*\*,  $P < 0.0001$ , unpaired Student’s t-test.

Supplementary Table 1  
 Patient Characteristics in Control, *CDC73/HRPT2*, and *MEN1* Patient Groups

| Patient group | n | Gender |   |            | Age (yrs) |      |            |
|---------------|---|--------|---|------------|-----------|------|------------|
|               |   | M      | F | P value    | Mean      | SEM  | P value    |
| Control       | 8 | 3      | 5 | <i>n/a</i> | 40.38     | 4.31 | <i>n/a</i> |
| CDC73/ HRPT2  | 5 | 3      | 2 | 0.59       | 31.2      | 4.99 | 0.20       |
| MEN1          | 9 | 7      | 2 | 0.15       | 42.67     | 3.61 | 0.69       |

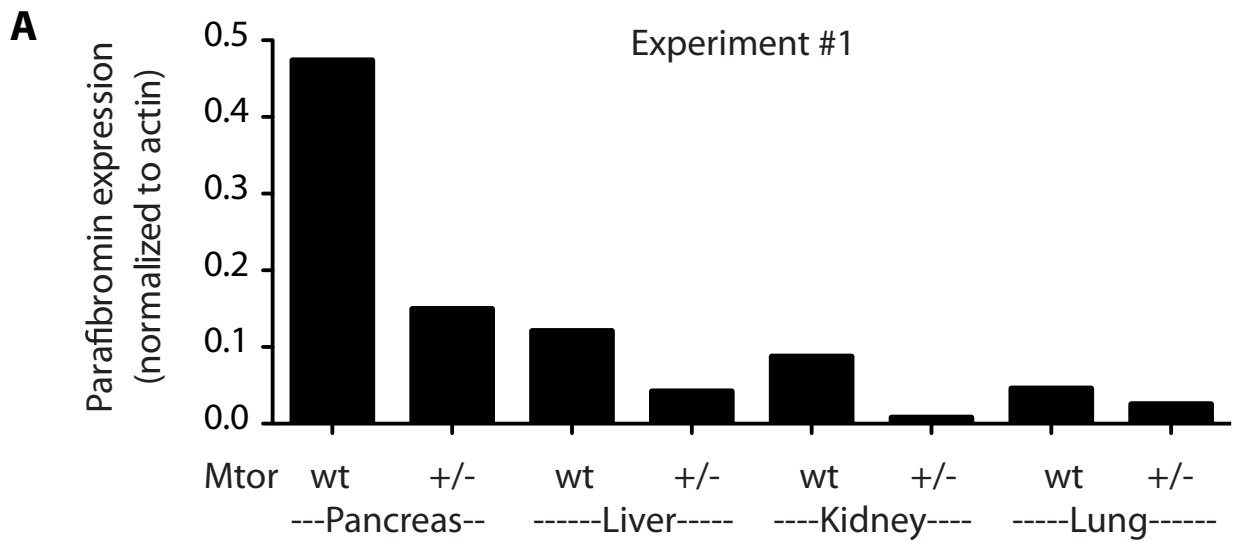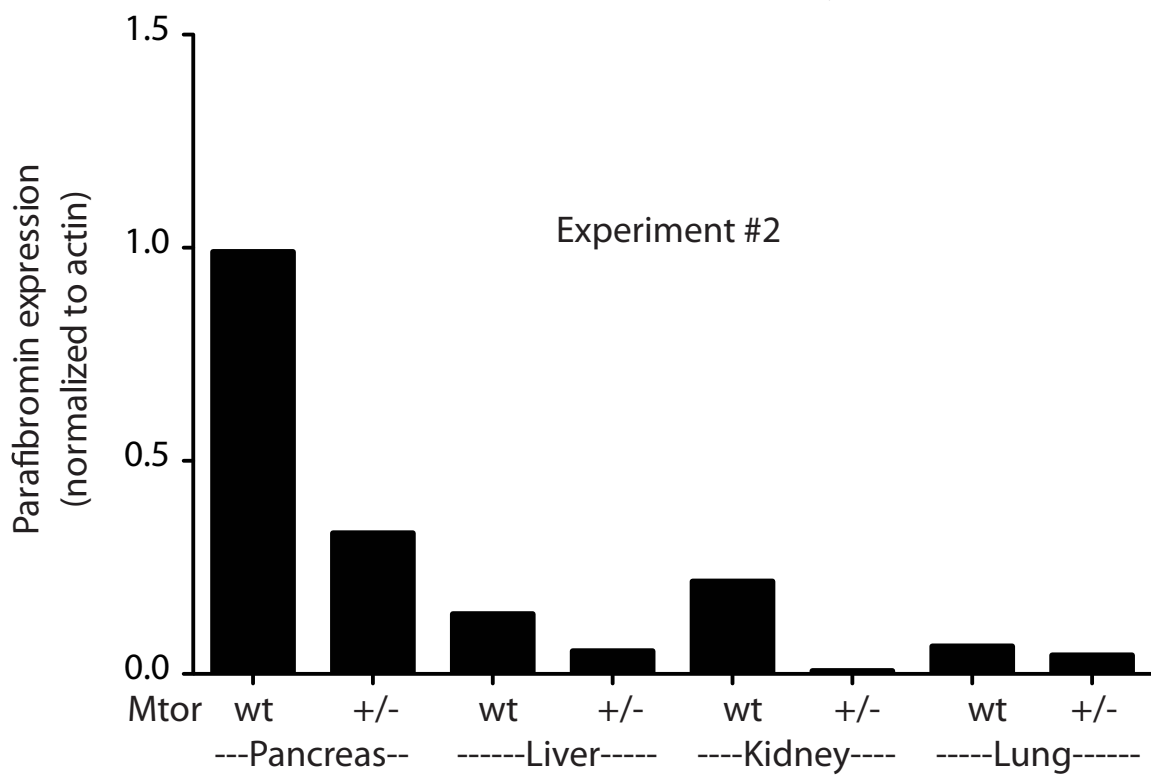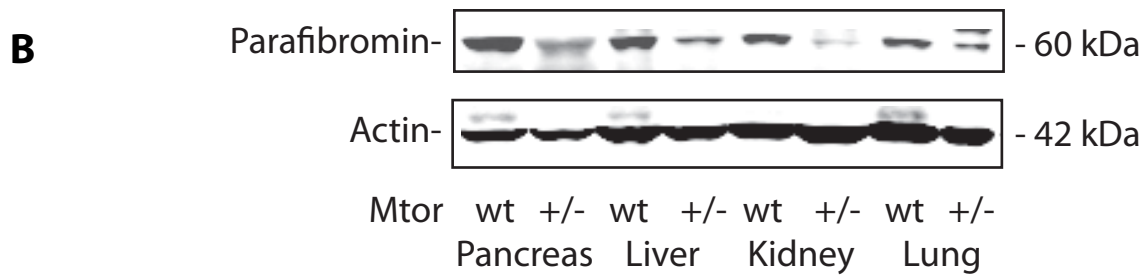

Supplemental Fig. 1 Zhang *et al*

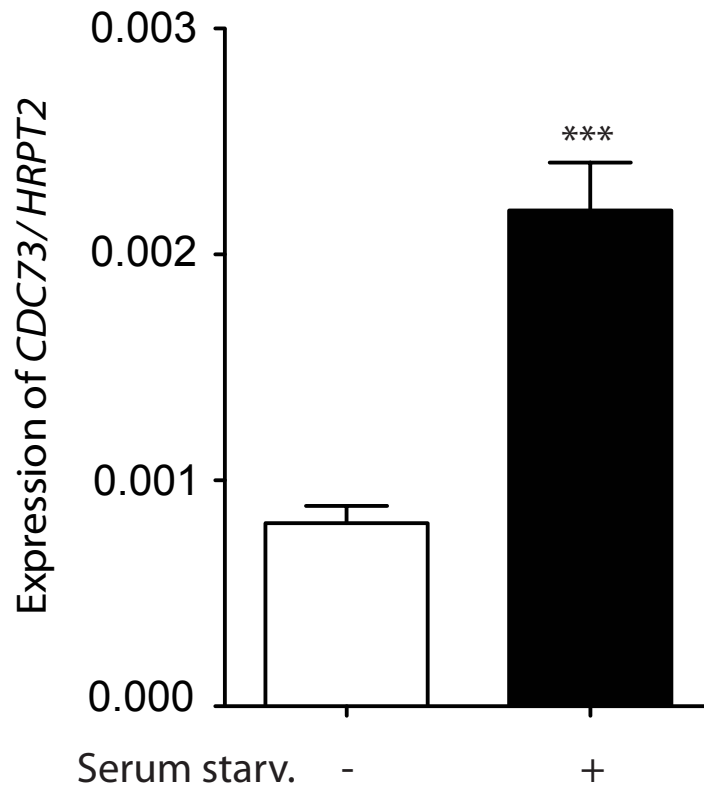

Supplemental Fig. 2 Zhang *et al*
